# Supplementary material for: Enhanced photoactivity and stability of carbon and nitrogen co-treated ZnO nanorod arrays for photoelectrochemical water splitting
Source: Royal Society of Chemistry journal article supplement (doi:10.1039/c2jm32605a), 2012-01-01
Supplement: c2jm32605a.pdf [file c2jm32605a.pdf]

## Supporting Information

### Enhanced photoactivity and stability of carbon and nitrogen co-treated ZnO nanorod arrays for photoelectrochemical water splitting

Shilei Xie,<sup>a</sup> Xihong Lu,<sup>a</sup> Teng Zhai,<sup>a</sup> Wei Li,<sup>a</sup> Minghao Yu,<sup>a</sup> Chaolun Liang,<sup>b</sup> and  
Yexiang Tong\*<sup>a</sup>

<sup>a</sup> *KLGHEI of Environment and Energy Chemistry, MOE of the Key Laboratory of Bioinorganic and Synthetic Chemistry, School of Chemistry and Chemical Engineering, Sun Yat-Sen University, Guangzhou 510275, People's Republic of China*

<sup>b</sup> *Instrumental Analysis and Research Centre, Sun Yat-Sen University, Guangzhou 510275, China*

#### Experimental Section

##### Synthesis of ZnO NRAs:

All reagents used were of analytical grade and were used directly without any purification. In a typical synthesis process, the cathodic deposition was performed in a conventional three-electrode glass cell by galvanostatic electrolysis. A F-doped SnO<sub>2</sub>-coated glass (FTO) substrate of 1.5 cm × 2 cm and a graphite rod of about 4.0 cm<sup>2</sup> were used as working electrode and counter electrode, respectively. The reference electrode was an Ag/AgCl electrode. Prior to electrodeposition, the FTO substrate was cleaned ultrasonically in distilled water, ethanol, and acetone and then rinsed in distilled water again. Three types of ZnO nanorods were electrodeposited on FTO

substrates in solution of 0.02 M  $\text{Zn}(\text{NO}_3)_2$ , 0.01 M  $\text{NH}_4\text{Ac}$  and 0.01 M Hexamethylenetetramine with a current density of  $0.5 \text{ mA cm}^{-2}$  for 60 min at  $90^\circ\text{C}$ .

Then, as-prepared ZnO nanorods were immersed in a 0.01 M glucose aqueous solution at room temperature for 12 h. After the immersion, the product was dried in an oven at  $110^\circ\text{C}$  at ambient pressure for 3 h, and was pyrolyzed in  $\text{NH}_3$  atmosphere (denoted as CN/ZnO) or Ar (denoted as C/ZnO) at  $500^\circ\text{C}$ . Meanwhile, the as-prepared ZnO were annealed in Ar (denoted as ZnO)  $\text{NH}_3$  atmosphere (denoted as N/ZnO) at same temperature.

#### **Characterizations:**

The as-synthesized products were characterized by field emission scanning electron microscope (FE-SEM, JSM-6330F), X-Ray Diffractometer (XRD, D8 ADVANCE), transmission electron microscopy (TEM, JEM2010-HR) and X-ray Photoelectron Spectroscopy (XPS, ESCALab250). The optical properties of the products were measured with a UV-Vis-NIR Spectrophotometer (UV-Vis, Varian Cary 5000). Raman spectroscopy was performed on a Laser Micro-Raman Spectrometer (Renishaw inVia) using a visible laser ( $\lambda = 514.5 \text{ nm}$ ) with an output laser power of 50 mW as the excitation wavelength at room temperature. Room temperature photoluminescence (PL) spectra were studied using a combined fluorescence lifetime and steady state spectrometer (FLS920, EDINBURGH) and the excitation wavelength was 300 nm.

#### **Photocatalytic and electrochemical measurements:**

PEC measurements were carried out in a three-electrode cell with a flat quartz window to facilitate illumination of the photoelectrode surface. The working electrode

is the CN/ZnO, C/ZnO, N/ZnO and ZnO, while a Pt wire electrode and a saturated Ag/AgCl electrode were used as counter and reference electrode, respectively. A 0.1 M Na<sub>2</sub>SO<sub>4</sub> aqueous solution was used as the electrolyte. The illumination source was a 500W Xe arc lamp (PLS-SXE-300/300UV, Beijing Changtuo) directed at the quartz photoelectrochemical cell. A 1.5 cm<sup>2</sup> region of the photoelectrode surface was illuminated. The photocurrent densities were recorded with a CHI 760D electrochemical workstation (CHI, Shanghai).

#### **Gas Collection:**

Gas generated in water splitting was collected in a home-made device (Fig. S5). The three-electrode cell with a flat quartz window was filled with 0.1 M Na<sub>2</sub>SO<sub>4</sub> electrolyte solution, and Ag/AgCl reference electrode and Pt wire counter electrode were inserted into the electrolyte. The Pt electrode positions were sealed with insulating epoxy resin to avoid gas leakage. As shown in the Fig. S5, gas was detected collected by gas chromatography (GC) with a thermal conductivity detector.

#### **Donor density calculation:**

The CN/ZnO sample exhibited the smallest slope compared to other samples, suggesting the CN/ZnO sample possess the most donor densities (carrier densities) after CN decorating according to the Mott-Schottky equation:

$$N_d = (2/e_0\epsilon\epsilon_0)[d(1/c^2)/dV]^{-1}$$

where  $e_0$  is the electron charge,  $\epsilon$  the dielectric constant of ZnO ( $\epsilon = 8$ ),  $\epsilon_0$  the permittivity of vacuum,  $N_d$  the dopant density and  $V$  the electrode applied potential.

1. U. Ozgur, Y. I. Alivov, C. Liu, A. Teke, M. A. Reshchikov, S. Dogan, V. Avrutin, S. J. Cho and H.

Morkoc, *J Appl Phys*, 2005, **98**.

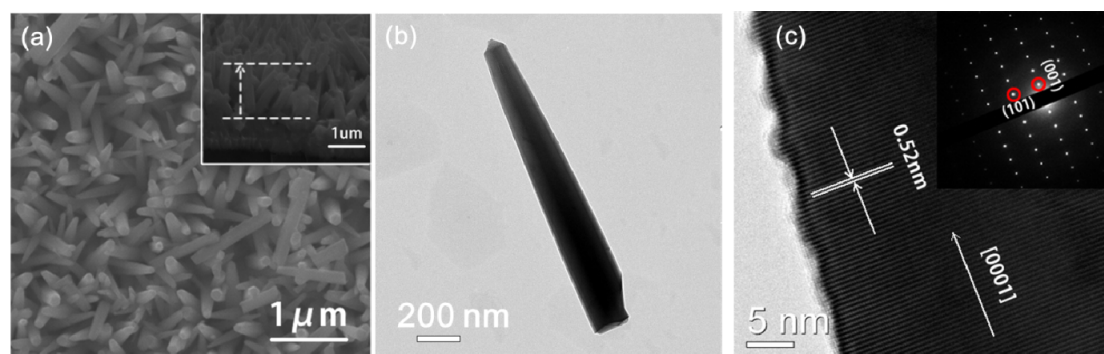

**Fig. S1** (a) Top view SEM image of ZnO NRAs. (b) TEM and (c) Lattice-resolved TEM image collected at edge of ZnO NRAs. The inset is the diffraction pattern recorded from the ZnO NRAs.

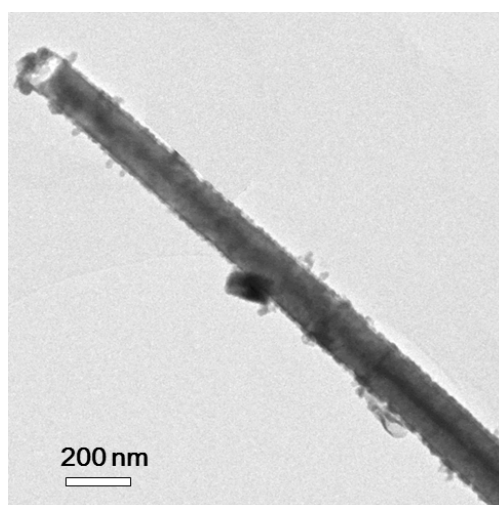

**Fig. S2** TEM image of the CN/ZnO nanorod.

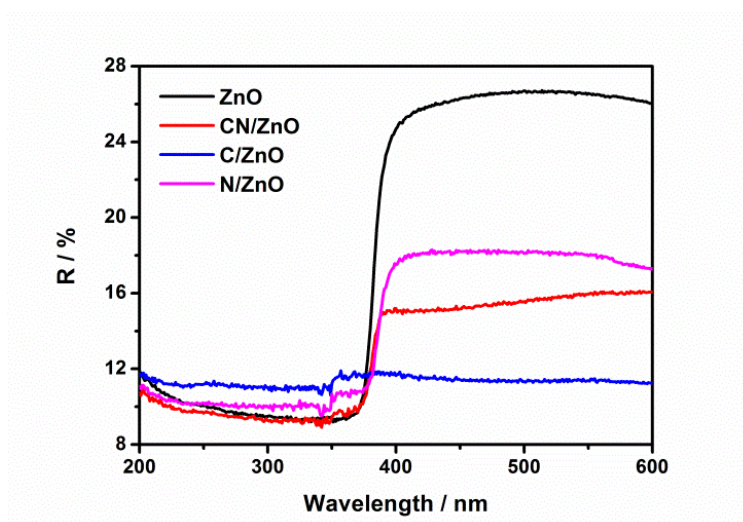

**Fig. S3** Diffuse reflectance UV-visible spectra of ZnO, CN-ZnO, N-ZnO and C-ZnO NRAs. All the samples show fairly low reflectance in the UV region (<380 nm) and their reflectance increases rapidly at around 380 nm, which is in accord with the direct band-gap absorption edge of ZnO (3.25 eV). The low reflectance for both the samples in the UV region is mainly attributed to their strong UV light-harvesting ability.

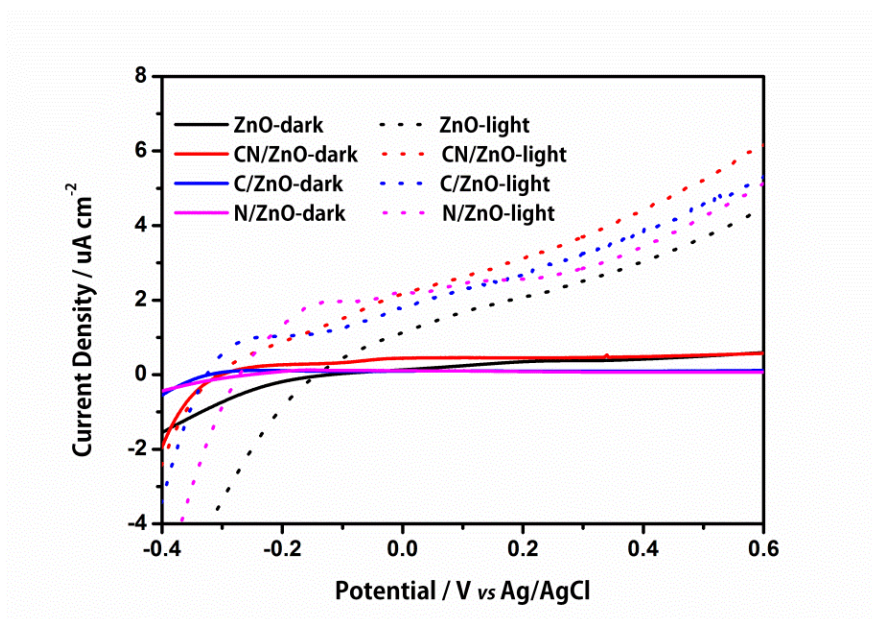

**Fig S4**  $I-V$  curves recorded under the visible-light irradiation with a UV filter (Changtuo,  $\lambda < 420$  nm) of ZnO, N/ZnO, C/ZnO and CN/ZnO with a scan rate of 10 mV/s.
